# Supplementary material
Source: MDPI journal article supplement (https://www.mdpi.com/2071-1050/14/24/16419)

# Supporting Information

## Facile preparation of Fe<sub>3</sub>O<sub>4</sub>@SiO<sub>2</sub> derived from iron-rich sludge as magnetic catalyst for the degradation of organic contaminants by peroxymonosulfate activation

Zhiwei Wang<sup>1</sup>, Shijun Zhu<sup>1\*</sup>, Jing Deng<sup>1</sup>, Haojie Li<sup>1</sup>, Liang Wang<sup>2</sup>, Haojin Luo<sup>3</sup>, Zehe Tang<sup>3</sup>,  
Xueyan Li<sup>4</sup>,

<sup>1</sup> College of Civil Engineering, Zhejiang University of Technology, Hangzhou 310023, China

<sup>2</sup> The Architectural Design and Research Institute of Zhejiang University Co., Ltd, Hangzhou 310028, China

<sup>3</sup> Wenzhou Design Group Co., Ltd, Wenzhou 325000, China

<sup>4</sup> School of Environmental Science and Engineering, Suzhou University of Science and Technology, Suzhou 215009, China

\*Correspondence: zhushijun\_2010@126.com (S. Z.)

### Text S1. The calculation of adsorption capacity

$$q_e = \frac{(C_0 - C_t) \times V}{m} \quad (S1)$$

Where  $q_e$  (mg/g) is the adsorption capacity for CIP,  $C_0$  represents the initial CIP concentration (10mg/L), and  $C_t$  (mg/L) reflects the concentration of CIP at the time of reaction.  $V$  and  $m$  are the volume of solution (50mL) and the quality of iron sludge in the reaction system (g), respectively.

**Table. S1** Characteristics of the iron-rich sludge used in this study

| Composition | Value (mg/g) | Composition | Value (mg/g) |
|-------------|--------------|-------------|--------------|
| Fe          | 188.6±3.50   | Cu          | 0.43±0.02    |
| Ca          | 5.89±0.15    | Ni          | 0.09±0.01    |
| Mg          | 0.87±0.05    | Pb          | 0.11±0.03    |
| Al          | 3.73±0.22    | P           | 1.62±0.35    |
| Mn          | 0.08±0.01    | S           | 2.08±0.64    |
| Co          | 0.04±0.00    |             |              |

**Table. S2** Elemental Composition of iron sludge by EDS.

| Element | C     | O     | Fe    | Si    | N     | Al   | Ca   | Mg   |
|---------|-------|-------|-------|-------|-------|------|------|------|
| At%     | 28.72 | 34.49 | 6.26  | 6.92  | 18.33 | 1.88 | 3.08 | 0.32 |
| Wt%     | 18.25 | 29.20 | 18.50 | 10.91 | 13.59 | 2.68 | 6.54 | 0.41 |

**Figure S1** XPS survey and spectra of Fe 2p peaks for iron-rich sludge

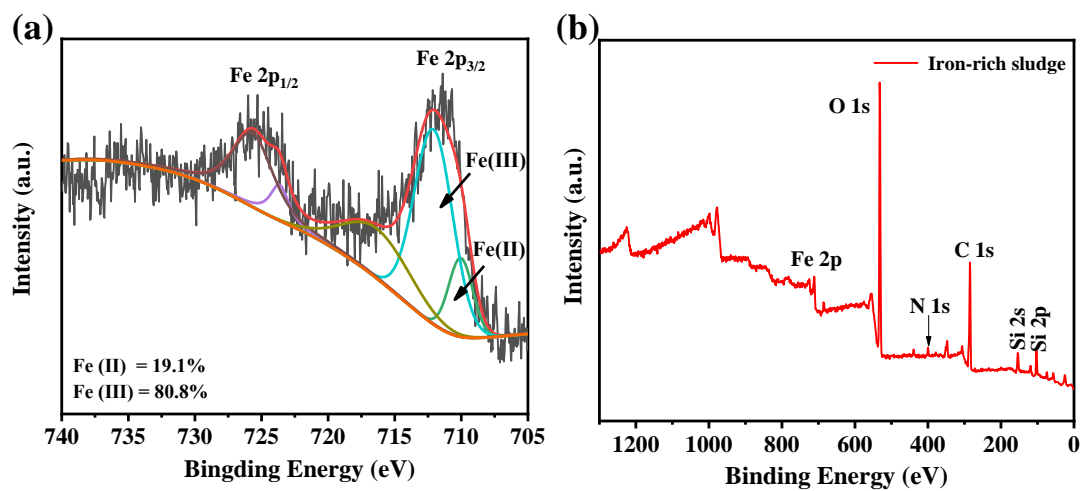

**Figure S2** The EDS mapping images of C, O, Fe, Si, and Ca.

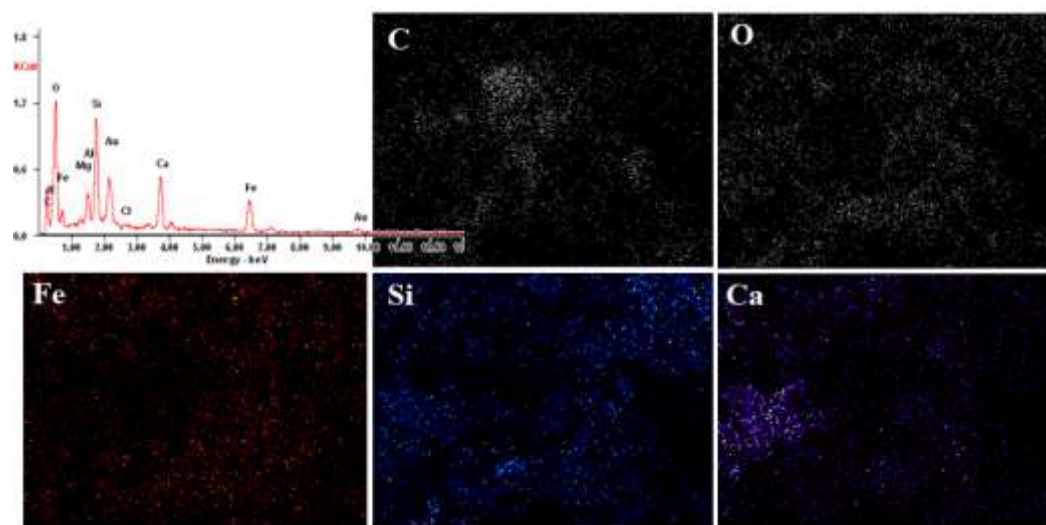

Supplement: s1 [file s1]
